# Supplementary material for: In situ generated chromophore as the indicator for background-free sensing strategy of hydrazine with high sensitivity with in vitro and in vivo applications
Source: Royal Society of Chemistry journal article supplement (doi:10.1039/c9tb00769e), 2019-01-01
Supplement: c9tb00769e1.pdf [file c9tb00769e1.pdf]

## Supporting Information (SI)

### ***In situ* generated chromophore as indicator for background-free sensing strategy of hydrazine and application *in vitro* and *vivo***

Peng Zhang, Yan Gong, Qian Zhang, Xinjie Guo and Caifeng Ding\*

*Key Laboratory of Optic-electric Sensing and Analytical Chemistry for Life Science, MOE; Shandong Key Laboratory of Biochemical Analysis; Key Laboratory of Analytical Chemistry for Life Science in Universities of Shandong; College of Chemistry and Molecular Engineering, Qingdao University of Science and Technology, Qingdao 266042, PR China.*

\*E-mail: [dingcaifeng2003@163.com](mailto:dingcaifeng2003@163.com),

### **Contents**

|                                                                        |     |
|------------------------------------------------------------------------|-----|
| 1. Synthesis of HDBM.....                                              | S-2 |
| 2. <sup>1</sup> H and <sup>13</sup> C NMR spectra (Figures S1-S2)..... | S-2 |
| 3. Spectral Figures (Figures S3–S8).....                               | S-4 |
| 4. Cell Cytotoxicity (Figures S9-S10).....                             | S-7 |

## 1. Synthesis of HDBM

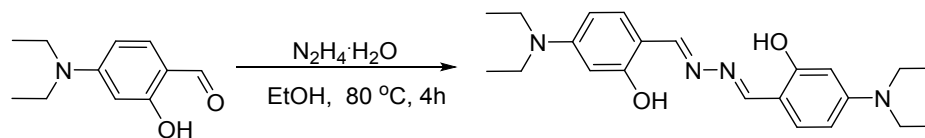

**Scheme S1.** Synthesis route of HDBM.

0.58 g (3.0 mmol) 4-diethylaminobenzaldehyde and 0.50 mL (8.5 mmol) hydrazine hydrate (85%) were stirred into 20 ml EtOH and several drops of glacial acetic acid were added as catalyst. The contents were heated at 80 °C with stirring for 4 h after which the solution was distilled off in vacuo and the resulting residue was recrystallized from EtOH/diethyl ether furnished the pure product (0.46 g) in 82% yield.  $^1\text{H}$  NMR (500 MHz,  $\text{DMSO-}d_6$ )  $\delta$  (ppm) 11.47 (s, 2H), 8.59 (s, 2H), 7.26 (d,  $J = 8.8$  Hz, 2H), 6.30-6.28 (m, 2H), 6.10 (d,  $J = 1.7$  Hz, 2H), 3.36 (q,  $J = 6.9$  Hz, 4H), 2.48 (t,  $J = 7.0$  Hz, 4H);  $^{13}\text{C}$  NMR (126 MHz,  $\text{DMSO-}d_6$ )  $\delta$  (ppm)  $^{13}\text{C}$  NMR (126 MHz,  $\text{DMSO}$ )  $\delta$  161.08, 133.44, 106.85, 104.49, 97.50, 44.29, 12.99. ESI-MS  $m/z$ :  $[\text{M}]^+$  Calcd for  $\text{C}_{22}\text{H}_{31}\text{N}_4\text{O}_2^+$  382.2369; Found 382.2376.

## 2. $^1\text{H}$ and $^{13}\text{C}$ NMR spectra

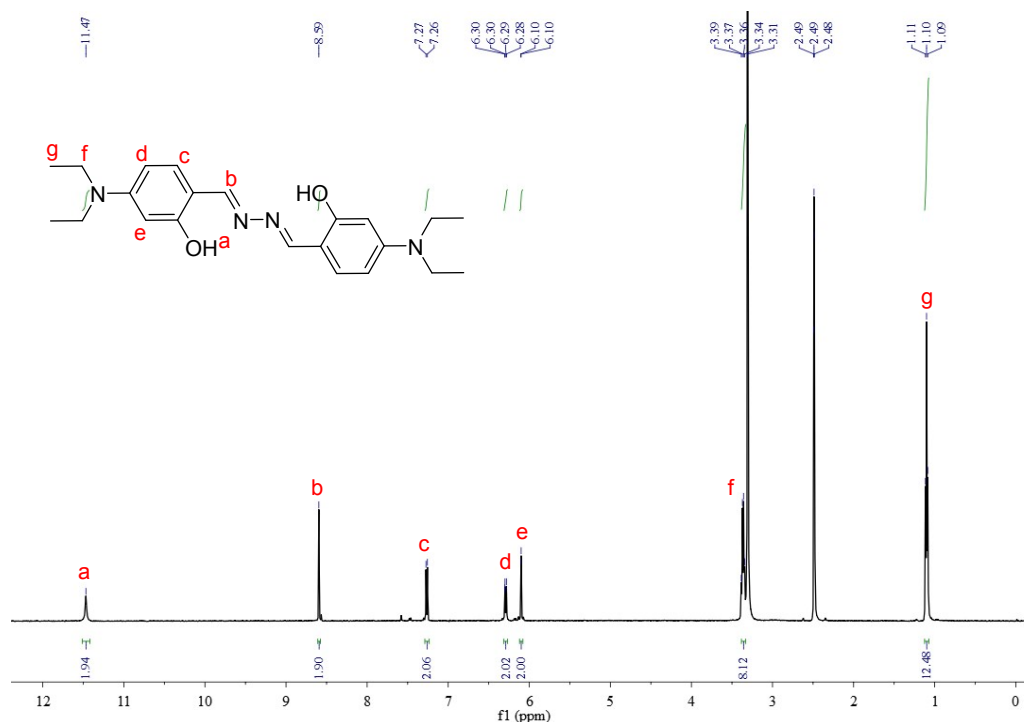

**Figure S1**  $^1\text{H}$  NMR spectrum of HDBM in  $\text{DMSO-}d_6$ .

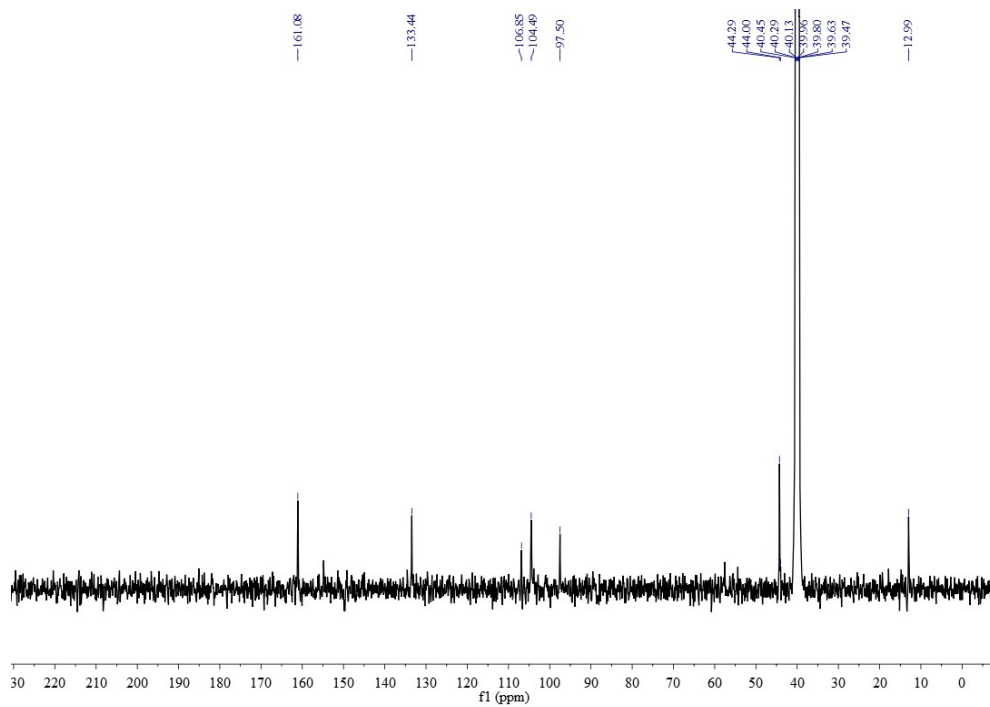

**Figure S2**  $^{13}\text{C}$  NMR spectrum of HDBM in  $\text{DMSO-}d_6$ .

### 3. Spectral Figures

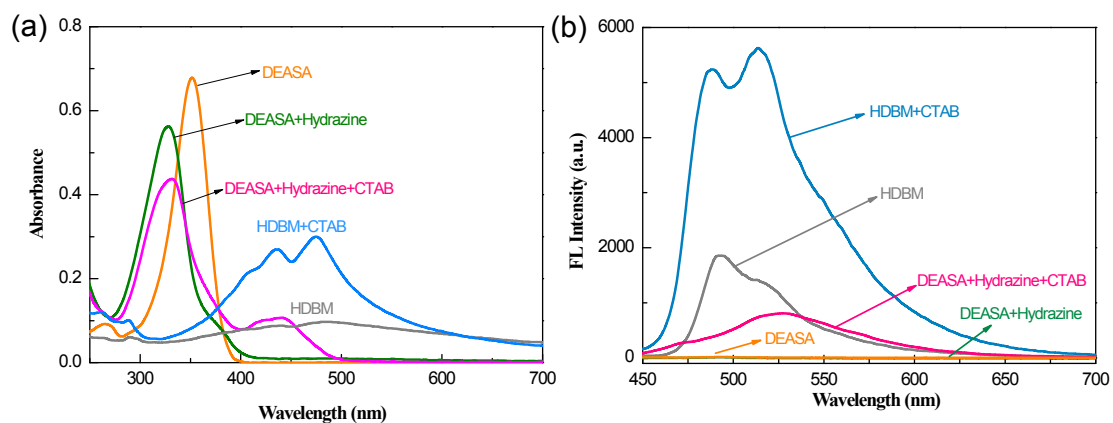

**Figure S3** (a) Absorption and (b) fluorescence spectra of DEASA/HDBM in the presence or absence of hydrazine and CTAB. [DEASA] = 20  $\mu$ M, [hydrazine] = 1.0 mM, [CTAB] = 1 mM, [HDBM] = 10  $\mu$ M,  $\lambda_{\text{ex}}$  = 420 nm.

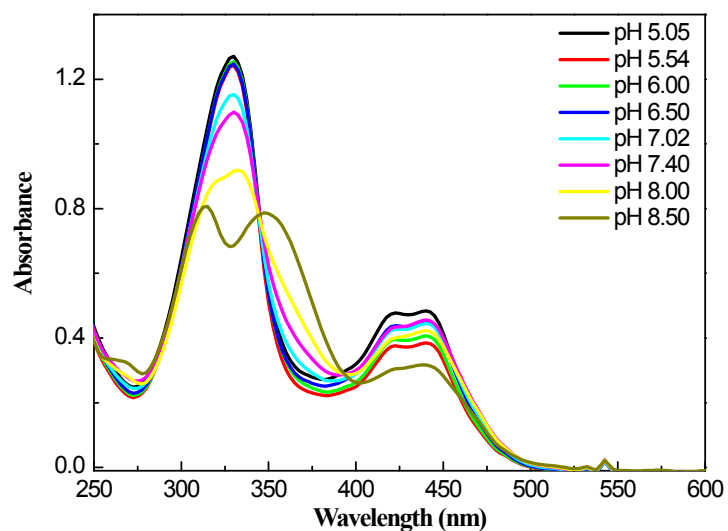

**Figure S4** Absorption spectra of DEASA and hydrazine reaction solution containing CTAB in PBS buffer of varying pH. [DEASA] = 50  $\mu$ M, [Hydrazine] = 2.5 mM, [CTAB] = 1mM.

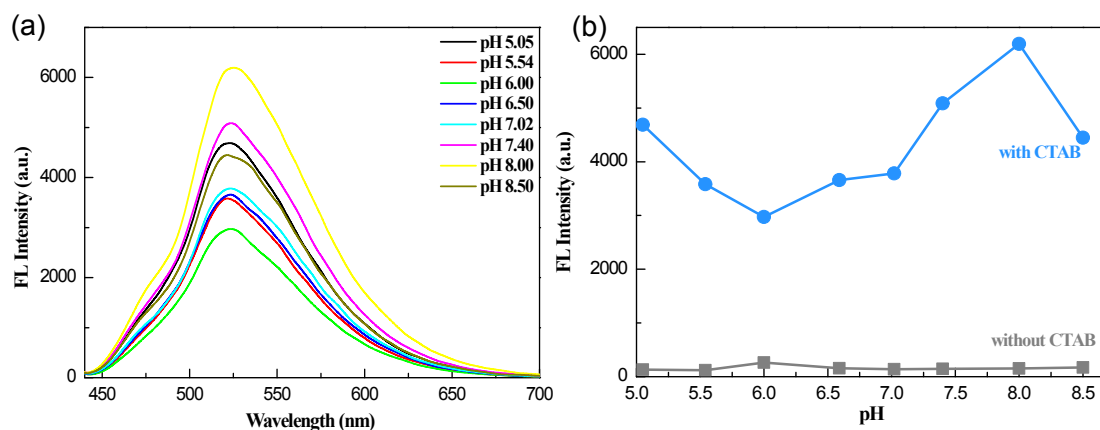

**Figure S5** (a) Fluorescence spectra of DEASA and hydrazine reaction solution containing CTAB in PBS buffer of varying pH. (b) Plots of intensity at 525 nm after reaction of DEASA and hydrazine in the presence (red dots) or absence (black squares) of 1.0 mM CTAB. [DEASA] = 50  $\mu$ M, [Hydrazine] = 500  $\mu$ M,  $\lambda_{\text{ex}}$  = 420 nm.

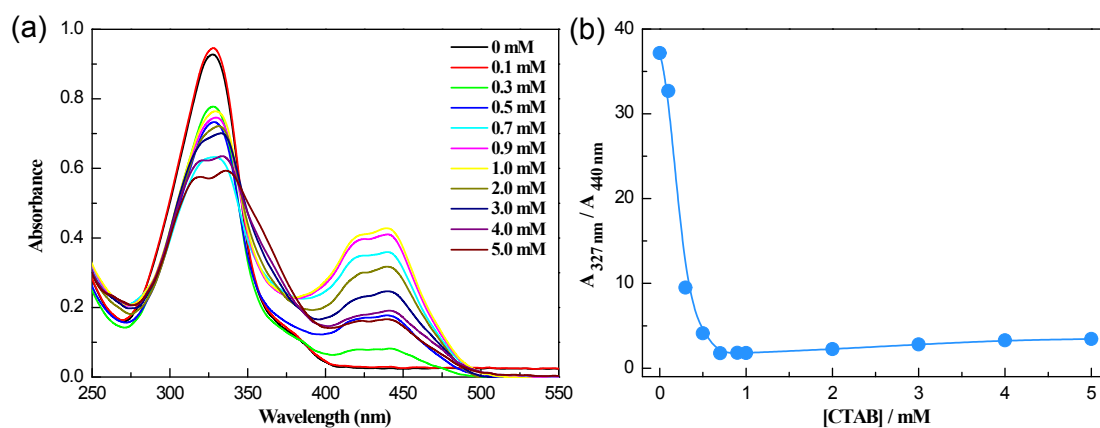

**Figure S6** (a) Absorption spectra of DEASA and hydrazine reaction solution in PBS buffer (10 mM, pH 7.4) containing CTAB of varying concentrations. (b) Plots of absorption ratio ( $A_{327 \text{ nm}} / A_{440 \text{ nm}}$ ) versus CTAB concentrations. [DEASA] = 50  $\mu$ M, [hydrazine] = 500  $\mu$ M.

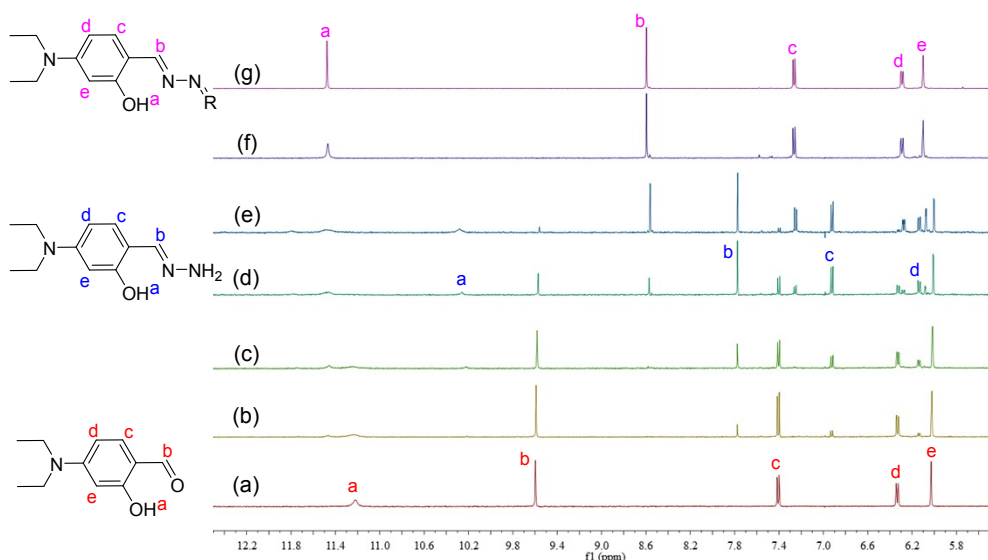

**Figure S7** <sup>1</sup>H NMR spectra of (g) HDBM and DEASA (a) (2.5 mM, DMSO-*d*<sub>6</sub>) with the addition of hydrazine (DMSO-*d*<sub>6</sub> solution) of (b) 0.25 mM, (c) 0.5 mM, (d) 1.25 mM, (e) 2.5 mM and (f) 12.5 mM.

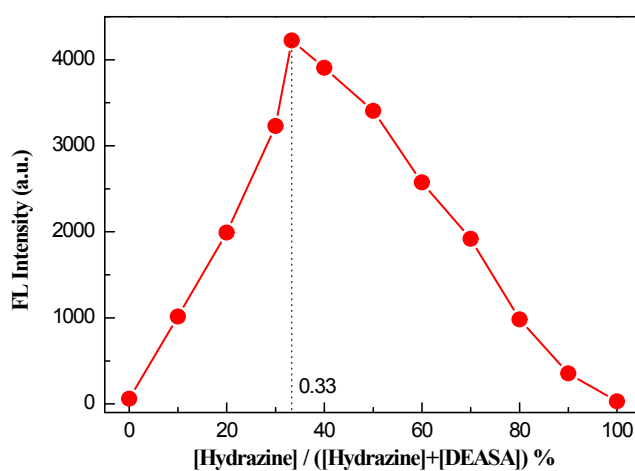

**Figure S8** Job plot of fluorescence at 525 nm against  $[\text{hydrazine}]/([\text{hydrazine}]+[\text{DEASA}])$ . Total concentration of hydrazine and DEASA was 100  $\mu\text{M}$ .

#### 4. Cell Cytotoxicity

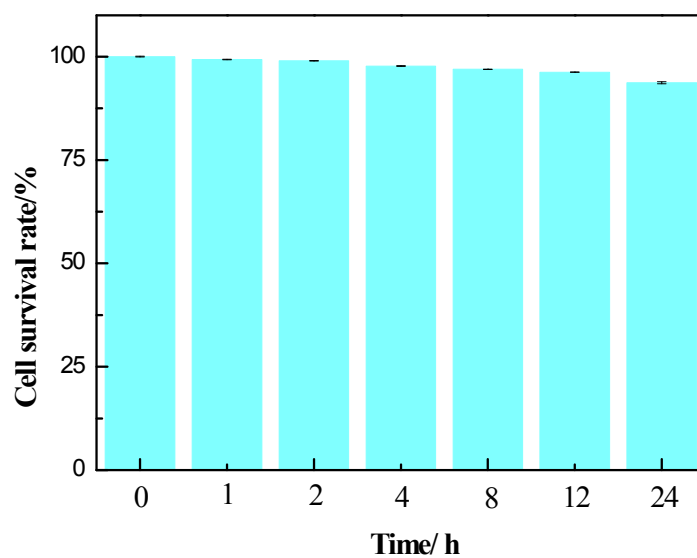

**Figure S9** Cytotoxicity of DEASA against HeLa cells as determined by CCK-8 assay: HeLa cells were treated with 50 μM DEASA for 0-24 hours.

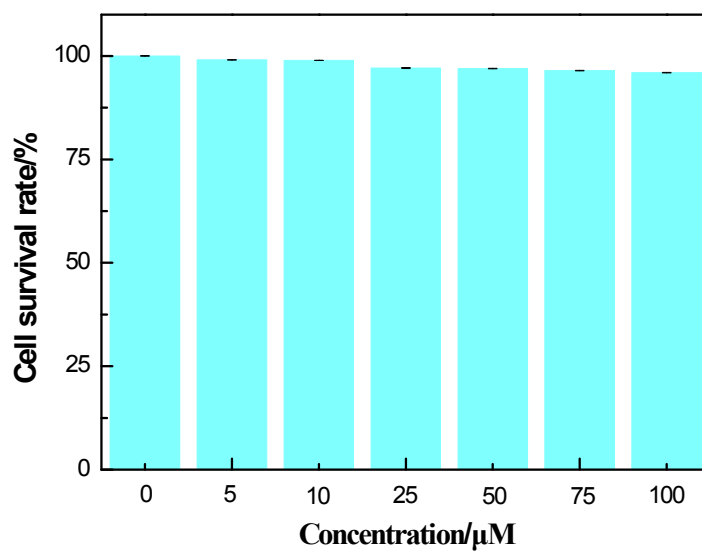

**Figure S10** Cytotoxicity of DEASA against HeLa cells as determined by CCK-8 assay: HeLa cells were treated with DEASA (0-100 μM) for 2 hours.
